# Supplementary material for: Raman spectroscopic study of anhydrous and hydrous REE phosphates, oxides, and hydroxides
Source: Royal Society of Chemistry journal article supplement (doi:10.1039/d4dt01086h), 2024-01-01
Supplement: d4dt01086h1.pdf [file d4dt01086h1.pdf]

Electronic Supplementary Information

for

**Raman spectroscopic study of anhydrous and hydrous REE phosphates, oxides, and hydroxides**

Nicole C. Hurtig, Alexander P. Gysi, Sarah E. Smith-Schmitz and Daniel Harlov

Supplementary Materials:

- Table S2 summary tables with reference data in xlsx format (ESI\_TableS2)
- Folder containing reference raw spectra for all solids measured in this study (Suppl\_rawfiles)
- Folder containing all Fityk files for peak deconvolution and fitting (Suppl\_Fit)

Electronic Supplementary Information comprises an additional literature data compilation summarized in Table S1 with more reference data listed in a separate excel file (ESI\_TableS2). We also provide a zip file (Suppl\_rawfiles) with raw data (txt) for all solids measured in this study as xy tables, which can be used with a variety of software packages for direct comparison of spectra. We further provide Fityk files with the peak deconvolution used in this study (Suppl\_Fit), which can be opened and viewed using the software package by Wojdyr (2010).

Table S1: Literature data compilation of previous Raman analyses for REE oxides, hydroxides and phosphates with more details given in the supplementary reference table (separate excel file).

| Solid    | Formula                        | Crystal system | Excitation laser (nm)                    | References    |
|----------|--------------------------------|----------------|------------------------------------------|---------------|
| La-oxide | La <sub>2</sub> O <sub>3</sub> | hexagonal      | 476.5, 488, 514.5, 524.5, 633, 647.1     | 1–5           |
| Pr-oxide | Pr <sub>2</sub> O <sub>3</sub> | hexagonal      | 457.9, 476.5, 496.5, 514.5, 520.8, 530.8 | 5             |
| Nd-oxide | Nd <sub>2</sub> O <sub>3</sub> | hexagonal      | 454.5, 457.9, 488, 514.5                 | 3–5           |
| Nd-oxide | Nd <sub>2</sub> O <sub>3</sub> | monoclinic     | na                                       | 6             |
| Eu-oxide | Eu <sub>2</sub> O <sub>3</sub> | monoclinic     | 532                                      | 7             |
| Gd-oxide | Gd <sub>2</sub> O <sub>3</sub> | monoclinic     | 514.5                                    | 8             |
| Sc-oxide | Sc <sub>2</sub> O <sub>3</sub> | monoclinic     | na                                       | 9             |
| Pr-oxide | Pr <sub>2</sub> O <sub>3</sub> | isometric      | 457.9, 488, 514.5                        | 10            |
| Nd-oxide | Nd <sub>2</sub> O <sub>3</sub> | isometric      | 457.9, 488, 514.5                        | 10            |
| Sm-oxide | Sm <sub>2</sub> O <sub>3</sub> | isometric      | 488                                      | 10            |
| Eu-oxide | Eu <sub>2</sub> O <sub>3</sub> | isometric      | 457.9, 488, 514.5                        | 10,11         |
| Gd-oxide | Gd <sub>2</sub> O <sub>3</sub> | isometric      | 457.9                                    | 10            |
| Tb-oxide | Tb <sub>2</sub> O <sub>3</sub> | isometric      | 457.9, 488, 514.5                        | 10            |
| Dy-oxide | Dy <sub>2</sub> O <sub>3</sub> | isometric      | 457.9, 488, 501.7, 514.5, 632.8, 647.1   | 10–13         |
| Ho-oxide | Ho <sub>2</sub> O <sub>3</sub> | isometric      | 514.5, 568.2                             | 10,12         |
| Y-oxide  | Y <sub>2</sub> O <sub>3</sub>  | isometric      | 457.9, 514.5, 568.2, 647.1               | 8,10,12,14–16 |
| Er-oxide | Er <sub>2</sub> O <sub>3</sub> | isometric      | 457.9                                    | 10            |
| Tm-oxide | Tm <sub>2</sub> O <sub>3</sub> | isometric      | 457.9, 488, 501.7, 514.5, 632.8          | 6,10,11,13    |
| Yb-oxide | Yb <sub>2</sub> O <sub>3</sub> | isometric      | na                                       | 6             |
| Lu-oxide | Lu <sub>2</sub> O <sub>3</sub> | isometric      | 532                                      | 8,17          |

|                |                                                   |            |                 |            |
|----------------|---------------------------------------------------|------------|-----------------|------------|
| Sc-oxide       | Sc <sub>2</sub> O <sub>3</sub>                    | isometric  | 457.9           | 9,10,18,19 |
| DyTm-oxide     | Dy <sub>2-x</sub> Tm <sub>x</sub> O <sub>3</sub>  | isometric  | 632.8           | 13         |
| DyY-oxide      | Dy <sub>2-x</sub> Y <sub>x</sub> O <sub>3</sub>   | isometric  | 647.1           | 12         |
| HoY-oxide      | Ho <sub>2-x</sub> Y <sub>x</sub> O <sub>3</sub>   | isometric  | 568.2           | 12         |
| La-hydroxide   | La(OH) <sub>3</sub>                               | hexagonal  | na              | 20,21      |
| Pr-hydroxide   | Pr(OH) <sub>3</sub>                               | hexagonal  | na              | 20         |
| Nd-hydroxide   | Nd(OH) <sub>3</sub>                               | hexagonal  | 514             | 20–22      |
| Sm-hydroxide   | Sm(OH) <sub>3</sub>                               | hexagonal  | na              | 21         |
| Eu-hydroxide   | Eu(OH) <sub>3</sub>                               | hexagonal  | na              | 21         |
| Gd-hydroxide   | Gd(OH) <sub>3</sub>                               | hexagonal  | na              | 21         |
| Tb-hydroxide   | Tb(OH) <sub>3</sub>                               | hexagonal  | na              | 21         |
| Dy-hydroxide   | Dy(OH) <sub>3</sub>                               | hexagonal  | na              | 21         |
| Xenotime-Gd    | GdPO <sub>4</sub>                                 | tetragonal | 532             | 23         |
| Xenotime-Tb    | TbPO <sub>4</sub>                                 | tetragonal | 514.5, 532, 647 | 24–27      |
| Xenotime-Dy    | DyPO <sub>4</sub>                                 | tetragonal | 488, 532        | 24,27,28   |
| Xenotime-Ho    | HoPO <sub>4</sub>                                 | tetragonal | 514.5           | 24         |
| Xenotime-Y     | YPO <sub>4</sub>                                  | tetragonal | 514.5, 568, 633 | 24,29–32   |
| Xenotime-Er    | ErPO <sub>4</sub>                                 | tetragonal | 457.9, 532, 785 | 24,33,34   |
| Xenotime-Tm    | TmPO <sub>4</sub>                                 | tetragonal | 514.5           | 24,34      |
| Xenotime-Yb    | YbPO <sub>4</sub>                                 | tetragonal | 488, 532, 785   | 24,33      |
| Xenotime-Lu    | LuPO <sub>4</sub>                                 | tetragonal | 514.5           | 24         |
| Xenotime-Sc    | ScPO <sub>4</sub>                                 | tetragonal | 514.5, 568      | 29         |
| Xenotime-GdDy  | Gd <sub>1-x</sub> Dy <sub>x</sub> PO <sub>4</sub> | tetragonal | 532             | 27         |
| Xenotime-ErYb  | Er <sub>1-x</sub> Yb <sub>x</sub> PO <sub>4</sub> | tetragonal | 532, 785        | 33         |
| Xenotime       | REEPO <sub>4</sub>                                | tetragonal | 473             | 35         |
| Monazite-La    | LaPO <sub>4</sub>                                 | monoclinic | 514, 532, 633   | 24,36–38   |
| Monazite-Ce    | CePO <sub>4</sub>                                 | monoclinic | 515, 632.8      | 36,37      |
| Monazite-Pr    | PrPO <sub>4</sub>                                 | monoclinic | 515, 632.8      | 36,37      |
| Monazite-Nd    | NdPO <sub>4</sub>                                 | monoclinic | 488             | 36         |
| Monazite-Sm    | SmPO <sub>4</sub>                                 | monoclinic | 514             | 36         |
| Monazite-Eu    | EuPO <sub>4</sub>                                 | monoclinic | 514             | 36         |
| Monazite-Gd    | GdPO <sub>4</sub>                                 | monoclinic | 514, 532        | 36         |
| Monazite-LaEu  | La <sub>1-x</sub> Eu <sub>x</sub> PO <sub>4</sub> | monoclinic | 532, 633        | 38         |
| Rhabdophane-La | LaPO <sub>4</sub> *0.667H <sub>2</sub> O          | monoclinic | na              | 39         |
| Rhabdophane-Nd | NdPO <sub>4</sub> *0.667H <sub>2</sub> O          | monoclinic | na              | 39         |
| Rhabdophane-Gd | GdPO <sub>4</sub> *0.667H <sub>2</sub> O          | monoclinic | 532             | 40         |

Abbreviations: na = information not available in the study.

## References

- 1 D. L. Hoang, A. Dittmar, M. Schneider, A. Trunschke, H. Lieske, K. W. Brzezinkab and K. Witke, *Thermochim Acta*, 2003, **400**, 153–163.
- 2 M. Scheithauer, H. Knözinger and M. A. Vannice, *J Catal*, 1998, **178**, 701–705.
- 3 S. I. Boldish and W. B. White, *Spectrochim Acta A*, 1979, **35**, 1235–1242.
- 4 J. H. Denning and S. D. Ross, *Journal of Physics C: Solid State Physics*, 1972, **5**, 1123–1133.
- 5 J. Zarembowitch, J. Goutheron and A. M. Lejus, *Physica status solidi B*, 1979, **94**, 249–256.
- 6 J. Cui and G. A. Hope, *Journal of Spectroscopy*, 2015, **2015**, 1–8.
- 7 M. T. Candela, F. Aguado, A. Diego-Rucabado, J. A. González and R. Valiente, *J Alloys Compd*, 2022, **921**, 166043.

- 8 L. Laversenne, Y. Guyot, C. Goutaudier, M. T. Cohen-Adad and G. Boulon, *Opt Mater (Amst)*, 2001, **16**, 475–483.
- 9 D. Liu, W. Lei, Y. Li, Y. Ma, J. Hao, X. Chen, Y. Jin, D. Liu, S. Yu, Q. Cui and G. Zou, *Inorg Chem*, 2009, **48**, 8251–8256.
- 10 M. V. Abrashev, N. D. Todorov and J. Geshev, *J Appl Phys*, 2014, **116**, 103508.
- 11 L. A. Tucker, F. J. Carney, P. McMillan, S. H. Lin and L. Eyring, *Appl Spectrosc*, 1984, **38**, 857–860.
- 12 J. C. Panitz, J. C. Mayor, B. Grob and W. Durisch, *J Alloys Compd*, 2000, **303–304**, 340–344.
- 13 X. Fu, Y. Xu and J. Zhou, *J Mater Sci*, 2012, **47**, 1697–1701.
- 14 Y. Repelin, C. Proust, E. Husson and J. M. Beny, *J Solid State Chem*, 1995, **118**, 163–169.
- 15 G. Schaack and J. A. Koningstein, *J Opt Soc Am*, 1970, **60**, 1110.
- 16 J. Gouteron, D. Michel, A. M. Lejus and J. Zarembowitch, *J Solid State Chem*, 1981, **38**, 288–296.
- 17 V. Grover, A. Banerji, P. Sengupta and A. K. Tyagi, *J Solid State Chem*, 2008, **181**, 1930–1935.
- 18 N. D. Todorov, M. V. Abrashev, V. Marinova, M. Kadiyski, L. Dimowa and E. Faulques, *Phys Rev B Condens Matter Mater Phys*, 2013, **87**, 104301.
- 19 A. A. Kaminskii, S. N. Bagaev, K. Ueda, K. Takaichi, J. Lu, A. Shirakawa, H. Yagi, T. Yanagitani, H. J. Eichler and H. Rhee, *Laser Phys Lett*, 2005, **2**, 30–35.
- 20 S. R. Sanivarapu, J. B. Lawrence and G. Sreedhar, *ACS Omega*, 2018, **3**, 6267–6278.
- 21 S. Liu, Y. Liu, Q. Mu, F. Zhang, H. Li and Y. Wang, *Appl Phys A Mater Sci Process*, 2013, **111**, 1229–1240.
- 22 S. Arunachalam, B. Kirubasankar, V. Murugadoss, D. Vellasamy and S. Angaiah, *New Journal of Chemistry*, 2018, **42**, 2923–2932.
- 23 N. Clavier, R. Podor and N. Dacheux, *J Eur Ceram Soc*, 2011, **31**, 941–976.
- 24 G. M. Begun, G. W. Beall, L. A. Boatner and W. J. Gregor, *Journal of Raman Spectroscopy*, 1981, **11**, 273–278.
- 25 A. Tatsi, E. Stavrou, Y. C. Boulmetis, A. G. Kontos, Y. S. Raptis and C. Raptis, *Journal of Physics Condensed Matter*, 2008, **20**, 425216.
- 26 E. Stavrou, A. Tatsi, E. Salpea, Y. C. Boulmetis, A. G. Kontos, Y. S. Raptis and C. Raptis, *J Phys Conf Ser*, 2008, **121**, 042016.

- 27 M. A. Musselman, T. M. Wilkinson, B. Haberl and C. E. Packard, *Journal of the American Ceramic Society*, 2018, **101**, 2562–2570.
- 28 R. J. Elliott, R. T. Harley, W. Hayes and S. R. P. Smith, *Proceedings of the royal society of London*, 1972, **328**, 217–266.
- 29 M. Giarola, A. Sanson, A. Rahman, G. Mariotto, M. Bettinelli, A. Speghini and E. Cazzanelli, *Phys Rev B Condens Matter Mater Phys*, 2011, **83**, 1–8.
- 30 W. P. Griffith, *Nature*, 1969, 224, 264–266.
- 31 Z. Zhao, J. Zuo and Z. Ding, *Journal of Rare Earths*, 2010, **28**, 254–257.
- 32 A. N. Lazarev, N. A. Mazhenov and A. P. Mirgorodskij, *Izv. Akad. Nauk SSSR, Neorg. Mater*, 1978, **14**, 2107–2118.
- 33 A. C. Strzelecki, M. Reece, X. Zhao, W. Yu, C. Benmore, Y. Ren, C. Alcorn, A. Migdisov, H. Xu and X. Guo, *ACS Earth Space Chem*, 2022, **6**, 1375–1389.
- 34 P. C. Becker, N. Edelstein, G. M. Williams, J. J. Bucher, R. E. Russo, J. A. Koningstein, L. A. Boatner and M. M. Abraham, *Phys Rev B*, 1985, **31**, 8102–8110.
- 35 E. Švecová, R. Čopjaková, Z. Losos, R. Škoda, L. Nasdala and J. Cícha, *Mineral Petrol*, 2016, **110**, 747–765.
- 36 E. N. Silva, A. P. Ayala, I. Guedes, C. W. A. Paschoal, R. L. Moreira, C. K. Loong and L. A. Boatner, *Opt Mater (Amst)*, 2006, **29**, 224–230.
- 37 D. Errandonea, O. Gomis, P. Rodriguez-Hernández, A. Munz, J. Ruiz-Fuertes, M. Gupta, S. N. Achary, A. Hirsch, F. J. Manjon, L. Peters, G. Roth, A. K. Tyagi and M. Bettinelli, *Journal of Physics Condensed Matter*, 2018, **30**, 065401.
- 38 T. Geisler, K. Popa and R. J. M. Konings, *Front Earth Sci (Lausanne)*, 2016, **4**, 1–12.
- 39 H. Liu, X. Zhao, Y. Teng, Y. Li, X. Zheng, S. Wang, L. Wu, P. K. Panda and R. Ahuja, *Journal of the American Ceramic Society*, 2022, **105**, 4974–4985.
- 40 N. Clavier, A. Mesbah, S. Szenknect and N. Dacheux, *Spectrochim Acta A Mol Biomol Spectrosc*, 2018, **205**, 85–94.
