# Supplementary material for: Raman spectroscopic study of anhydrous and hydrous REE phosphates, oxides, and hydroxides
Source: Royal Society of Chemistry journal article supplement (doi:10.1039/d4dt01086h), 2024-01-01
Supplement: d4dt01086h2.xlsx [file d4dt01086h2.xlsx]

## Sheet: Oxides A-type
Peak assingment	Ref -1	Denning and Ross (1972)					v2Eg			V2A1							v1Ag	v1Eg
Peak assingment	Ref -2	Boldish and White (1979)								Eg		A2g					A1g	Eg
Solid	Crystal system	Reference	Laser (nm)	Grating (gr/mm)	Uncertainty (cm-1)	IR 7-fold(*)				v4		v2					v1	v3
La2O3	hexagonal	Hoang et al. (2003)	514.5, 633		2	1.1				105		192					406
La2O3	hexagonal	Scheithauer et al. (1998)	476.5, 488. 514.5			1.1				104		191		322			408					935
La2O3	hexagonal	Boldish and White (1979)	524.5			1.1				107		195					410	410
La2O3	hexagonal	Denning and Ross (1972)				1.1	74			108							408	444
La2O3	hexagonal	Denning and Ross (1972)	cacluated			1.1	67			117							401	449
La2O3	hexagonal	Zarembowitch et al. (1979)	647.1, 514.5, 488			1.1				106		191				400	408
Pr2O3	hexagonal	Zarembowitch et al. (1979)	530.8, 520.8, 514.5, 496.5, 476.5, 457.9			1.056				104		187				406	413
Nd2O3	hexagonal	Zarembowitch et al. (1979)	514.5, 488, 457.9, 454.5			1.0445				106		191					428	436
Nd2O3	hexagonal	Boldish and White (1979)	488			1.0445				102		190					427	436
Nd2O3	hexagonal	Denning and Ross (1972)				1.0445	74			108							440	480
Nd2O3	hexagonal	Denning and Ross (1972)	cacluated			1.0445	73			118							437	477
La2O3	hexagonal	This study	532	1800	0.5	1.1	63.9607	83.1183	91.3405	104.98	138.893	191.067	192.461	288.091	342.211	364.347	407.595							3601.41
La2O3	hexagonal	This study	266	2400	1.5	1.1									303.583		404.209		535.415				1055.38
La2O3	hexagonal	This study	266	2400	1.5	1.1									304.272		404.239		533.502	557.87
Nd2O3	hexagonal	This study	532	1800	0.5	1.0445	64			102.99		183.9					428.464			678.366	720.913		2377.16	3992.46
Nd2O3	hexagonal	This study	532	1800	0.5	1.0445				102.9		184.04					427.254	431.84		680.884	720.331
Nd2O3	hexagonal	This study	266	2400	1.5	1.0445							228.935	259.353			431.77	475.337		602.752	769.974	895.807	1090.09
Nd2O3	hexagonal	This study	266	2400	1.5	1.0445							229.113	258.88			431.928	477.301			778.988	896.753	1093.93
(*)	IR ionic radii from Shannon (1967)

## Sheet: Oxides B-type
Peak assingment	Ref -1	Candela et al. (2022)							Ag1	Bg1	Ag2	Bg2			Ag3	Ag4	Ag5		Ag6	Ag7	Bg3	Ag8	Bg4	Bg5		Ag9	Ag10		Ag11
Solid	Crystal system	Reference	Laser (nm)	Grating (gr/mm)	Uncertainty (cm-1)	IR 6-fold	IR 7-fold
Nd2O3	monoclinic	Cui et al. (2015)				0.983	1.0445															296	362			387	472
Eu2O3	monoclinic	Candela et al. (2022)	532			0.947	1.01		81.45	96.23	108.91	120			154	173.9	217.4		243.6	256.8	282.9	373.3	392.6	410.7		423.1	462.5		577.3
Gd2O3	monoclinic	Laversenne et al. (2001)	514.5			0.938	1				102					176				256	269	386	417	430		442	483
Sc2O3	monoclinic	Liu et al. (2009)				0.745	0.8075
Sm2O3	monoclinic	This study	532	1800	0.5	0.958	1.02	71.8193	80.8884	95.8945	109.186	117.583	123.945	137.209	168.586	173.537	199.523	218.091	248.543	257.211	285.155	343.347	373.853	396.735	411.717	422.176	461.057	549.248	570.233		1149.4	2272.56	3451.83
Sm2O3	monoclinic	This study	266	2400	1.5	0.958	1.02													254.24	282.23	337.924	371.652	397.048		418.183	459.297		567.367
Sm2O3	monoclinic	This study	266	2400	1.5	0.958	1.02													254.367	282.52	338.419	371.682	397.705		418.539	459.509		567.323		1098.25
Sm2O3	monoclinic	This study	266	2400	1.5	0.958	1.02													254.758	282.632	338.709	372.239	395.91		417.309	458.26		567.804	833.499	1096.47

## Sheet: Oxides C-type
Peak assignment1	Ref -1	Repelin et al. (1995)						Fg	Fg	Fg+Ag	Fg	Fg+Eg	Fg	Fg+Eg				Fg+Ag	Fg	Fg	Fg+Ag	Fg	Fg+Eg		Fg+Ag
Peak assignment2	Ref -2	Gouteron et al. (1981)							Fg	Fg+Ag	Fg	Eg	Fg	Fg	Fg			Eg	Fg	Fg	Fg		Eg		Fg
Peak assignment3	Ref -3	Schaack and Koningstein (1970)							Fg	Fg+Ag			Fg+Eg	Eg				Fg+Ag		Fg	Fg				Fg
Peak assignment4	Ref -4	Abrashev et al. (2014)						Fg		Ag	Fg	Eg	Fg	Eg+Fg				Fg		Ag	Fg				Fg
Solid	Crystal system	Reference	Laser (nm)	Grating (gr/mm)	Uncertainty (cm-1)	IR 6-fold
Pr2O3	isometric	Abrashev et al. (2014)	457.9, 488, 514.5			0.99		99		117								322			393
Nd2O3	isometric	Abrashev et al. (2014)	457.9, 488, 514.5			0.983		100		116								331			401				539
Sm2O3	isometric	Abrashev et al. (2014)	488			0.958		94	109	118	133	145	179	299				345		393	421				554
Eu2O3	isometric	Tucker et al. (1984)	514.5, 501.7, 488, 457.9			0.947		91					197	284	314			337	380		422				556	868	916
Eu2O3	isometric	Abrashev et al. (2014)	488			0.947		94	109	119	134	145	175	289				339	385		425
Gd2O3	isometric	Abrashev et al. (2014)	457.9			0.938		95	110	119	135	145	175		315			361		414	444				569
Tb2O3	isometric	Abrashev et al. (2014)	457.9, 488, 514.5			0.923		95		118								367			450
Dy2O3	isometric	Tucker et al. (1984)	514.5, 501.7, 488, 457.9			0.917				117					327			371		425	462				584	1005	1110
Dy2O3	isometric	Abrashev et al. (2014)	457.9, 488, 514.5			0.917		96		120	136	145			330			371		425	464				589
Dy2O3	isometric	Panitz et al. (2000)	647.1		0.04	0.917												372.71
Dy2O3	isometric	Fu et al. 2012	632.8			0.917		95.7		119.9	135.6							373.3			465.4				586.5
Ho2O3	isometric	Abrashev et al. (2014)	514.5			0.901		97	102	120	136	146	176		330			376		430	471				590
Ho2O3	isometric	Panitz et al. (2000)	568.2		0.04	0.901												374.64
Y2O3	isometric	Repelin et al. (1995)	514.5			0.9		116	129	161	179	193		318	329			376	399	431	469	526	564		591
Y2O3	isometric	Schaack and Koningstein (1970)				0.9			133	164				320	333			381		434	473				597
Y2O3	isometric	Gouteron et al. (1981)				0.9			130	161	182	194		318	330	379		383	402	430	468		567		592
Y2O3	isometric	Abrashev et al. (2014)	457.9			0.9		129	138	162	182	194	235	325				377		431	469				592
Y2O3	isometric	Laversenne et al. (2001)				0.9		77	132.8	164		195.7		320.5	333.5			380.9		433.8	472.8				597
Y2O3	isometric	Panitz et al. (2000)	647.1; 568.2		0.01	0.9												377.99
Er2O3	isometric	Abrashev et al. (2014)	457.9			0.89		97		119	135	144	175		334			379		434	478				595
Tm2O3	isometric	Fu et al. (2012)	632.8			0.88		96.7		120.6	135.6							384.8			485				603.5
Tm2O3	isometric	Abrashev et al. (2014)	457.9, 488, 514.5			0.88		97		121	136	144			334			384		438	485				604
Tm2O3	isometric	Tucker et al. (1984)	514.5, 501.7, 488, 457.9			0.88				142					337			384		435	482				602	1028	1084
Tm2O3	isometric	Cui and Hope (2015)				0.88										384
Yb2O3	isometric	Cui and Hope (2015)				0.868										365
Lu2O3	isometric	Grover et al. (2008)	532			0.861		98		120	137	146			348			393		454	499				612
Lu2O3	isometric	Laversenne et al. (2001)				0.861		98		120		191		289	348			393		454	499				614
Sc2O3	isometric	Abrashev et al. (2014)	457.9			0.745		189		202	221	253	273	319	359			419		495	523				669
Sc2O3	isometric	Todorov et al. (2013)				0.745		189		202	221	252	273	319	359		391	419		495	523	587	623	626	669
Sc2O3	isometric	Todorov et al. (2013)	calculated			0.745		180		194	215	249	269	317	361	366	386	426		478	512	584	618	620	663
Sc2O3	isometric	Liu et al. (2009)				0.745		190			222		273	320	358		392	419		495	525			628	674
Sc2O3	isometric	Kaminskii et al. (2005)						190			222		273	320	358		391	419	428	495	524
Dy.75Tm0.25	isometric	Fu et al. (2012)	632.8					94.5		118.7	134.4							375			468.1				590.2
Dy0.5Tm0.5	isometric	Fu et al. (2012)	632.8					95.1		118	134.4							378			472.7				594.5
Dy0.25Tm0.75	isometric	Fu et al. (2012)	632.8					95.3		119.2	134.4							381.2			478.3				599
Dy0.02Y0.98	isometric	Panitz et al. (2000)	647.1		0.05													377.85
Dy0.05Y0.94	isometric	Panitz et al. (2000)	647.1		0.05													378.03
Dy0.1Y0.9	isometric	Panitz et al. (2000)	647.1		0.05													377.58
Dy0.2Y0.8	isometric	Panitz et al. (2000)	647.1		0.05													377.02
Dy0.5Y0.5	isometric	Panitz et al. (2000)	647.1		0.05													375.32
Ho0.02Y0.98	isometric	Panitz et al. (2000)	568.2		0.05													377.17
Ho0.05Y0.94	isometric	Panitz et al. (2000)	568.2		0.05													377.11
Ho0.1Y0.9	isometric	Panitz et al. (2000)	568.2		0.05													377.14
Ho0.2Y0.8	isometric	Panitz et al. (2000)	568.2		0.05													376.97
Ho0.5Y0.5	isometric	Panitz et al. (2000)	568.2		0.05													376.45
Eu2O3	isometric	This study	532	1800	0.5	0.947		94.3445		118.838	134.756	144.852		284.723	313.586			338.63	385.948	410.732	425.221				568.812	636.666	721.411
Eu2O3	isometric	This study	266	2400	1.5	0.947									315.361			333.179	398.979			547.127					893.183
Eu2O3	isometric	This study	266	2400	1.5	0.947								283.314				332.787	393.778						563.615	649.925	878.335	1671.49
Dy2O3	isometric	This study	532	1800	0.5	0.917		95.2686		118.617	134.655	144.576	175.556	264.037	327.112			371.995		424.089	462.635		567.029		584.391	591.81				3598.24
Dy2O3	isometric	This study	266	2400	1.5	0.917									325.884	348.597		370.474		422.859	460.941	520.487	562.901		582.771	597.376	790.557	1103.04	3578.44	3599.2	3873.8
Dy2O3	isometric	This study	266	2400	1.5	0.917								263.739	325.879	348.909		370.488		423.721	460.617	521.902	561.334		582.545	595.781	789.118	1108.58
Ho2O3	isometric	This study	532	1800	0.5	0.901		96.1031		119.082		144.9			320.95	356.56		374.125								643.941
Ho2O3	isometric	This study	266	2400	1.5	0.901									327.745			375.026			468.45	526.495	567.863		588.369	662.216
Y2O3	isometric	This study	532	1800	0.5	0.9				129.813	161.942	194.517	273.253	317.806	329.8	351.4		377.433	415.469	430.775	468.968	532.861	563.621		589.783	643.043	731.66	806.115	844.369	965.756	1053.99	1061.11
Y2O3	isometric	This study	266	2400	1.5	0.9									327.683	353.199		375.371			466.997	527.538	565.517		590.625
Er2O3	isometric	This study	532	1800	0.5	0.89		73.2229	103.289				223.185	253.876				377.903										802.915			3627.73	4058.3
Er2O3	isometric	This study	266	2400	1.5	0.89							268.493	298.348	331.727	357.411		376.662	401.93		474.429	531.303	573.299		593.033			1113.62
Er2O3	isometric	This study	266	2400	1.5	0.89							269.197	302.337	331.732	357.468		376.628	398.541		474.419	531.656	572.83		593.067		808.626	1114.11
Yb2O3	isometric	This study	266	2400	1.5	0.868								300.818	334.822			359.852		417.9	468.2		581.177		609.655
Yb2O3	isometric	This study	266	2400	1.5	0.868								300.288	335.034			359.863			468.2		582.282		610.111
Lu2O3	isometric	This study	532	1800	0.5	0.861		97.2682		119.526	135.164	145.066			347.026			391.582	400.585	452.789	498.367	554.519	568.104		609.613	641.357	656.369	728.101	750.2	838.24	1002.67	1093.65	2433.04
Lu2O3	isometric	This study	532	1800	0.5	0.861		97.2033		119.458	135.107	145.007	175.187	179.993	346.91			391.503	400.429	452.569	498.281	554.763	568.069		609.56	641.489	656.292	728.283	750.217	838.127	1002.75	1093.69	2433.04
Lu2O3	isometric	This study	266	2400	1.5	0.861									345.023			369.207	390.394		496.466	544.131	590.268		611.186
Lu2O3	isometric	This study	266	2400	1.5	0.861									345.317			369.502	390.461		496.509	544.083	589.813		611.006

## Sheet: Hydroxides
Peak assignment1	Ref -1	Sanivarapu et al. (2018)																										A1g	E2g		E1g													vOH
Peak assignment2	Ref -2	Arunachalam et al. (2018)																						E2g(T)				Ag	Ag	Ag	E1g						E1g
Peak assignment3	Ref -3	Liu et al. (2013)																										Ag	E2g		E1g
Solid	Crystal system	Reference	Laser (nm)	Grating (gr/mm)	Uncertainty (cm-1)	IR 6-fold
La(OH)3	hexagonal	Sanivarapu et al. (2018)				1.216																						281	340		451													3603
La(OH)3	hexagonal	Liu et al. (2013)			1	1.216																						281	336		451
Pr(OH)3	hexagonal	Sanivarapu et al. (2018)				1.216																						292	354		466													3597
Nd(OH)3	hexagonal	Sanivarapu et al. (2018)				1.163																						294	365		472													3598
Nd(OH)3	hexagonal	Arunachalam et al. (2018)	514			1.163																		137				299	353	404	470	573					784
Nd(OH)3	hexagonal	Liu et al. (2013)			1	1.132																						216	351		544
Sm(OH)3	hexagonal	Liu et al. (2013)			1	1.132																						301	374		478
Eu(OH)3	hexagonal	Liu et al. (2013)			1	1.083																						312	392		494
Gd(OH)3	hexagonal	Liu et al. (2013)			1	1.083																						308	385		490
Tb(OH)3	hexagonal	Liu et al. (2013)			1	1.073																						311	388		497
Dy(OH)3	hexagonal	Liu et al. (2013)			1	1.073																						301			499
La(OH)3	hexagonal	This study	266	2400	1.5	1.216																				228.204		280.952	339.889		451.141			636.3	654.156	748.008	781.91	811.771		1067.98	1075.81	1091.22		3602.09
La(OH)3	hexagonal	This study	266	2400	1.5	1.216																				227.861		281.041	340.079		451.502			644.375	654.533	747.904	782.106	812.285		1069.08	1076.77	1090.74
La(OH)3	hexagonal	This study	532	1800	0.5	1.216				59.5306				75.2527	82.9199	91.1518	94.2918	99.0176	106.611	111.265		123.008		138.591		228.042		282.589	340.93		450.15		606.965		652.819					1070.92	1076.79	1091.33		3602.31
La(OH)3	hexagonal	This study	532	1800	0.5	1.216				59.573	63.3143	67.1888	71.4204	75.2053	82.8512	91.0272	94.2945	98.9389	106.653	111.18	117.152	122.779		138.527		232.207		282.378	341.032		448.992		608.908
La(OH)3	hexagonal	This study	266	2400	1.5	1.216																				230.329		281.825	344.503		448.831			646.566										3602.36
Nd(OH)3	hexagonal	This study	532	1800	0.5	1.163	43.639	48.7174	51.1378	60.1194		67.626	71.9113	75.726	83.4665	91.5804	94.8882	99.5721	107.041	115.355	117.679	123.301		138.353		239.997		294.297	362.152		471.519			638.045	682.193						1072.88
Nd(OH)3	hexagonal	This study	532	1800	0.5	1.163				59.6374	63.5106	67.39	71.2853	75.1895	83.0516	91.1	94.3304	98.8742	106.561	114.861		122.822		138.011		240.273		294.071	362.015		470.095			637.706	676.904						1072.58	1720.44		3595.39
Nd(OH)3	hexagonal	This study	266	2400	1.5	1.163																				236.923		293.93	361.841		469.474			667.863	685.824	748.419	786.115	817.62		1040.32	1076.44	1144.65		3598.43
Nd(OH)3	hexagonal	This study	266	2400	1.5	1.163																				236.563		293.946	361.652		469.734			664.935	686.301	748.136	786.346	821.884			1073.01
Sm(OH)3	hexagonal	This study	266	2400	1.5	1.132																						298.314	373.498		482.155			689.353	702.604	749.812	787.8	819.117	842.514	867.603	1072.51	1146.46		3595.93
Sm(OH)3	hexagonal	This study	266	2400	1.5	1.132																						298.584	373.603		481.533			687.901	701.162	750.237	787.474	818.842	841.537	868.559	1071.87	1146.53
Sm(OH)3	hexagonal	This study	532	1800	0.5	1.132				59.7538		67.2691	71.5217	75.3396	83.1019	91.2131	94.4666	99.234	106.671	114.991	117.415	123.106		136.566		247.039		301.588	375.549		480.067			665.364						1005.98				3597.09	3608.04
Sm(OH)3	hexagonal	This study	532	1800	0.5	1.132				59.6866		67.3115	71.5673	75.2819	83.076	91.1752	94.4592	99.1738	106.726	114.881	117.271	123.057		136.519		246.574		301.367	375.269		480.353			663.255	703.728
Dy(OH)3	hexagonal	This study	532	1800	0.5	1.083				59.555		67.2397	71.4494	75.129	82.9837	90.9977	94.4355	99.0319	106.608			122.746	132.131			261.002		313.257	394.2	406.1	501.788			696.463	737.539						1082.4			3597.39	3611.33
Dy(OH)3	hexagonal	This study	532	1800	0.5	1.083	43.872	48.9444	51.7668	60.0541		67.599	71.8944	75.6328	83.405	91.5324	94.6871	99.3794	107.001	115.136			132.585			262		313.681	394.638	406.158	501.925			696.929	735.758
Dy(OH)3	hexagonal	This study	266	2400	1.5	1.083																						310.713	396.352		499.465	689.628			730.685						1076.63	1088.38		3597.82	3611.81
Dy(OH)3	hexagonal	This study	266	2400	1.5	1.083																						310.936	392.309	404.651	499.496			692.207	732.257						1078.96
Y(OH)3	hexagonal	This study	266	2400	1.5	1.073																						312.975	398	405	505.672			700.281	745.876									3603.61	3618.2
Y(OH)3	hexagonal	This study	532	1800	0.5	1.073				59.6072		67.2868	71.4556	75.1657	82.9659	91.0477	94.3758	99.0621	106.581	115.009	117.156	122.833	128.758	138.753	174.582	259.707		314.055	399.4	405.7	507.025			702.167	746.089						1084.3			3602.79	3617.21

## Sheet: Xenotime
Peak assignment1	Ref -1	Giarola et al. (2011)									Eg(1)		B1g(1)		Eg(2)	Eg(3)	B1g(2)	B2g		A1g(1)	Eg(4)				B1g(3)										A1g(2)		Eg(5)		B1g(4)
Peak assignment2	Ref -2	Strzelecki et al. (2022)																							v4				v1					v1	v1		v3		v3	v3		d(OH)	v1CO2	dH2O	v3CO2	v3CO2	v(OH)	v(OH)	v(OH)
Peak assignment3	Ref -3	Stavrou et al. (2008)								Eg	Bg1		Eg			Eg(R)	B2g			A1g	Eg				B1g										A1g		Eg		B1g
Peak assignment4	Ref -4	Tatsi et al. (2008)								Eg	Bg1		Eg(B1g)			Eg(R)	B2g			A1g	Eg				B1g										A1g		Eg		B1g
Peak assignment5	Ref -5	Clavier et al. (2018)															lattice	lattice	lattice	v2	v4	v4	v4	v4	v4									v1	v1		v3	v3	v3
Peak assignment6	Ref -6	Begun et al. (1982)								B1g(T)	Eg(T)		B1g(T)		Eg(T)	Eg(R)	B2g			A1g	Eg				B1g										A1g		Eg		B1g
Solid	Crystal system	Reference	Laser (nm)	Grating (gr/mm)	Uncertainty (cm-1)	IR 8-fold
GdPO4	tetragonal	Clavier et al. (2018)	532	1800		1.053											332	346	364	481	557	567	574	586	646									984	991		1013	1046	1057
TbPO4	tetragonal	Begun et al. (1982)	514.5		1	1.04				130	141		183		267	293	331			484	576				649										995		1014	1043	1049
TbPO4	tetragonal	Tatsi et al. (2008)	514, 647		3	1.04				130	141		185			293	331			484	576				649										995		1014		1049
TbPO4	tetragonal	Musselman et al. (2018)	532	1800	1.3	1.04										293	332			485	576				651										996		1015		1051
TbPO4	tetragonal	Stavrou et al. (2008)	514			1.04				130	141		185			293	331			484	576				649										995		1014		1049
DyPO4	tetragonal	Begun et al. (1982)	488		1	1.027				132	141		185			295	331			485	578				654										998		1019		1054
DyPO4	tetragonal	Musselman et al. (2018)	532	1800	1.3	1.027										294	332			485	577				654										998		1019		1054
DyPO4	tetragonal	Elliott et al. (1972)	theoretical			1.027				130	140		184			294	330			485	585				653										997		1017		1053
YPO4	tetragonal	Begun et al. (1982)	514.5		1	1.019	96			121	157		185	210	267	299	332			484	581				660										1001		1027	1048	1058
YPO4	tetragonal	Griffith (1968)	633			1.019														485	550														998		1020		1055
YPO4 theory	tetragonal	Giarola et al. (2011)				1.019					163		182		204	292	300	306		472	544				638										987		1011		1040
YPO4 measured	tetragonal	Giarola et al. (2011)	514, 568	1800		1.019					155		185		209	299	316	331		485	581		481.8		659										1001		1026		1058
YPO4	tetragonal	Zhang et al. (2009)				1.019					157		184		210	298		330		482	579			658.333	656								1.51658	999.6	1000		1025		1057	1.22474	1057
YPO4	tetragonal	Lazarev et al. (1978)				1.019					156		186		208	298		332		485	583				660										998		1025		1057
HoPO4	tetragonal	Begun et al. (1982)	514.5		1	1.015				132	141		184			297	336			486	578				656										1001		1021		1055
ErPO4	tetragonal	Begun et al. (1982)	457.9		1	1.004				132			185			300	330			477	580				659										1004		1024		1061
ErPO4	tetragonal	Strzelecki et al. (2022)	532, 785	600	1	1.004																			631.7				865					939.6	988.9		1028.3		1072.5	1124.3		1378.8	1446.8	1649.8	2041.5	2478.1	2904.1	3133	3293.4
ErPO4	tetragonal	Becker et al. 1985	theoretical			1.004				132			185			299	330			486	578				658										1003		1023		1060
TmPO4	tetragonal	Begun et al. (1982)	514.5		1	0.994				132			185		266	303	330			488	580				660										1006		1027		1064
TmPO4	tetragonal	Becker et al. 1985	theoretical			0.994				133	139		186			304	331			488	581				662										1006		1025		1065
YbPO4	tetragonal	Begun et al. (1982)	488		1	0.985	98			132	138		186		268	302	330			491	582				663										1009		1030	1048	1068
YbPO4	tetragonal	Strzelecki et al. (2022)	532, 785	600	1	0.985																			640.4				881.6					970.6	1004.6		1042.9		1084	1130.5		1386.1	1482	1630.3	2065.5	2379.2	-	3053.7	3315.4
LuPO4	tetragonal	Begun et al. (1982)	514.5		1	0.977				138	144		191			308	334			493	587				670										1011		1032		1069
ScPO4 theory	tetragonal	Giarola et al. (2011)				0.87					190		243		246	320	372	342		452	573				662										1041		1045		1092
ScPO4 measured	tetragonal	Giarola et al. (2011)	514, 568	1800		0.87					187		234		245	326	336	350		474	595				677										1027		1044		1083
ScPO4	tetragonal	Zhang et al. (2009)				0.87					187		244a		234a	325	335			474	594														1027		1044		1083
Gd60Dy40PO4	tetragonal	Musselman et al. (2018)	532	1800	1.3	1.0426										292	332			484	576				650										995		1014		1051
Gd50Dy50PO4	tetragonal	Musselman et al. (2018)	532	1800	1.3	1.04										296	335			488	580				654										999		1018		1054
Gd40Dy60PO4	tetragonal	Musselman et al. (2018)	532	1800	1.3	1.0374										293	332			485	577				651										996		1015		1053
Er0.88Yb0.22PO4	tetragonal	Strzelecki et al. (2022)	532, 785	600	1	1.0058																			634.7				865.7					946	993.5		1032.7		1075.5	1125.9		1380.4	1478.1	1641.1	2028.6	2351.8	2980.3	3202.2	3354.3
Er0.75Yb0.25PO4	tetragonal	Strzelecki et al. (2022)	532, 785	600	1	1.00775																			634.7				871.5					954.6	996.3		1035.1		1075.6	1122.9		1391.9	1488.5	1630.5	2062.1	2348.1	2865.6	3107.2	3290.8
Er0.62Yb0.38PO4	tetragonal	Strzelecki et al. (2022)	532, 785	600	1	1.0097																			635.7				866					981	1008.2		1039.6		1070.7	1111		1384.6	1455.4	1520.8	-	2355.5	-	3190	-
Er0.47Yb0.53PO4	tetragonal	Strzelecki et al. (2022)	532, 785	600	1	1.01195																			636.1				882					971.9	1004.2		1038.7		1074	1121.1		1383.9	1465.8	1566.1	2067.2	-	2820.9	3112.4	3344
Er0.35Yb0.65PO4	tetragonal	Strzelecki et al. (2022)	532, 785	600	1	1.01375																			633.5				937.7					974.2	1004.4		1037.6		1070.9	1119.1		1390.2	1465.8	1571.6	2070.1	-	2863.6	3145.1	3350.9
Er0.22Yb0.78PO4	tetragonal	Strzelecki et al. (2022)	532, 785	600	1	1.0157																			638.6				880.1					964.5	1001		1039.8		1081.1	1128.7		1390.4	1482.2	1629.4	-	2317.4	2936.1	3163.6	3343.9
Y0.61Ca0.11Dy0.04Th0.04Yb0.03Er0.03Zr0.03Gd0.02U0.02Fe0.02Sm0.01Ho0.01Tm0.01Nd0.01Tb0.01	tetragonal	Svecova et al. (2016)	473	1800	1																														992				1057
Y0.72Dy0.05U0.04Yb0.04Er0.03Zr0.03Th0.03Gd0.02Sm0.01Ho0.01Nd0.01Lu0.01Tb0.01Tm0.01	tetragonal	Svecova et al. (2016)	473	1800	1																														993				1057
Y0.74Dy0.05Yb0.04Er0.04Zr0.03Gd0.02U0.02Th0.01Sm0.01Ho0.01Tm0.01Tb0.01Lu0.01Nd0.01	tetragonal	Svecova et al. (2016)	473	1800	1																														994				1056
Y0.79Dy0.05Er0.04Yb0.01Gd0.03Sm0.01Ho0.01Tm0.01Lu0.01U0.01Nd0.01Tb0.01	tetragonal	Svecova et al. (2016)	473	1800	1																														995		1021		1053
Y0.74Dy0.09Gd0.06Er0.04Yb0.02Ho0.01Tb0.01Sm0.01Eu0.01	tetragonal	Origlieri 2021/RRUFF																																	998				1056
Y0.85Dy0.11Yb0.04	tetragonal	Obodda 2021/RUFF																																	999				1056
TbPO4	tetragonal	This study	532	1800	0.5	1.04				129.686	140.261					291.692	330.272		455.562	484.377	575.14				650.509		813.669								994.027		1013.9		1049.34
TbPO4	tetragonal	This study	532	1800	0.5	1.04				129.72	140.191		182.403			291.617	330.356			484.195	574.913				650.61		814.694		875.877	895.603	916.899		959.053	972.647	994.085		1013.99		1049.34
TbPO4	tetragonal	This study	266	2400	1.5	1.04										290.135			436.744	483.583	573.998				649.574	788.415			875.668	896.358	915.51			972.291	993.207		1013.39		1048.46
DyPO4	tetragonal	This study	532	1800	0.5	1.027				130.638	139.623		183.328			294.56	330.444			485.485	576.02				652.83	731.12	817.886		866.255	902.38	918.665		961.228		996.908		1017.05		1053.02
DyPO4	tetragonal	This study	532	1800	0.5	1.027				130.649	139.638		183.241			294.591	330.488			485.6	575.957				652.733	730.956	817.902		866.262	902.435	919.831		961.297		996.873		1017.01		1052.99
DyPO4	tetragonal	This study	266	2400	1.5	1.027										290.701	329.92			484.1	575.061				651.758		815.773	830.588	876.368	897.684	918.312	936.469	971.016	974.182	996.048		1015.59		1051.71
DyPO4	tetragonal	This study	266	2400	1.5	1.027										291.415	329.778			484.376	574.717				651.709		816.005	830.833	876.005	897.84	918.474	936.614	971.82	974.151	996.009		1015.52		1051.66
YPO4	tetragonal	This study	266	2400	1.5	1.019										296.903	329.556			483.659	578.979				657.859	814.104			883.477	925.36				980.973	999.005		1024.4		1056.6
YPO4	tetragonal	This study	532	1800	0.5	1.019					156.331		184.553	209.625		298.352	331.157			485.119	580.123				658.86		825.4					930.567	964.529		999.776		1025.31		1057.44
HoPO4	tetragonal	This study	532	1800	0.5	1.015																													999.735		1019.98		1056.11
HoPO4	tetragonal	This study	532	1800	0.5	1.015																													999.756		1020.04		1056.11
HoPO4	tetragonal	This study	266	2400	1.5	1.015														485.946					654.636			830.22	882.975	887.845		932.307	974.72		999.478		1020.09		1055.91
ErPO4	tetragonal	This study	532	1800	0.5	1.004	91.8151	116.084	123.711	131.533	140.154		181.522		235.707	298.597	329.919																		1002.22	1002.52	1022.92		1059.31
ErPO4	tetragonal	This study	532	1800	0.5	1.004	95.2315	118.556		131.501	140.172	170.79	184.458		236.967	298.591	329.917															941.588			1002.17	1002.56	1022.92		1059.27
ErPO4	tetragonal	This study	266	2400	1.5	1.004										298.687		423.46	443.562	486.135	578.263				657.304		804.161		869.855	906.38	926.218			981.056	1002.34		1022.7		1059.13
ErPO4	tetragonal	This study	266	2400	1.5	1.004										298.109		423.33	441.966	485.71	577.662				657.729		799.503		870.186		925.687			980.503	1002.02		1022.3		1058.66
TmPO4	tetragonal	This study	532	1800	0.5	0.994					137.79					301.815	329.269			487.318	579.337				659.714										1004.26		1025.44		1062.3
TmPO4	tetragonal	This study	532	1800	0.5	0.994				131.307	137.927		184.574			301.704	329.188			487.45	579.45				659.722			828.055		880.127		928.309			1004.33		1025.4		1062.39
TmPO4	tetragonal	This study	266	2400	1.5	0.994									219.336	300.387				486.822	578.48							823.98		881.325	886.815	926.74	929.929	981.399	1003.72		1024.96		1061.59	1289.2
YbPO4	tetragonal	This study	532	1800	0.5	0.985				131.921	137.828		184.824			301.177	329.432			489.556	580.982				662.181			828.773		890.689			929.534		1007.51		1028.29		1065.87
YbPO4	tetragonal	This study	266	2400	1.5	0.985											328.084			488.23	580.309				661.276		805.533			911.524	930.393	969.054	984.683	1004.37	1007.14		1027.69		1065.11
LuPO4	tetragonal	This study	532	1800	0.5	0.977				131.906	138.466		185.828			304.238	329.068	420.416		487.454	581.819			622.51	664.37						935.799	971.066			1009.72		1031.2		1067.97
LuPO4	tetragonal	This study	532	1800	0.5	0.977				131.929	138.427		185.742			304.233	329.187	421.015		487.391	581.713				664.367						934.997				1009.65		1031.12		1067.89
LuPO4	tetragonal	This study	266	2400	1.5	0.977										303.236	327.463		446.439	486.478	580.688				663.294		801.11	832.114	870.107	880.46	911.786	934.47	987.479		1009.05		1030.6		1067.4
Y0.53Dy0.47PO4	tetragonal	This study	532	1800	0.5	1.01195					145.701		195.54			295.56	331.061	420.815	440.306	485.577	577.887				655.944			821.422	881.636	902.024	922.671		950.948	978.461	997.983		1020.82		1054.88
Y0.53Dy0.47PO4	tetragonal	This study	266	2400	1.5	1.01195										294.728	328.932			484.076	577.117				655.086			820.62		901.987	922.403			977.851	997.627		1020.87		1054.82
Y0.49Er0.50PO4	tetragonal	This study	532	1800	0.5	1.023	65.0133						186.465		235.681	298.468																			1001.33		1024.34		1058.66
Y0.49Er0.50PO4	tetragonal	This study	266	2400	1.5	1.023										296.801	381.122	421.258	442.13	485.532	578.191				656.806	748.149	782.303	828.661	852.114	884.96	905.543	924.88		979.509	1000.39		1022		1056.87
[truncated: 2 more columns]

## Sheet: Monazite
Peak assignment1	Ref -1	Errandonea et al. (2018)					Bg(T)	Ag(T)	Ag(T)	Ag(T)	Bg(R)	Bg(T)	Ag(R)	Ag®	Bg(T)	Bg(R)	Ag(T)	Bg(T)	Ag(T)	Bg(R)	Bg(T)	Ag(T)	Bg(T)	Ag(R)			Bg(ν2)	Ag(ν2)		Ag(ν2)	Bg(ν2)	Ag(ν4)	Bg(ν4)	Ag(ν4)	Bg(ν4)	Ag(ν4)	Bg(ν4)				Bg(ν1)	Ag(ν1)		Ag(ν3)	Ag(ν3)	Bg(ν3)	Ag(ν3)	Bg(ν3)	Bg(ν3)
Peak assignment2	Ref -2	Silva et al. (2006)					Bg		Ag				Ag	Bg	Bg	Ag	Ag/Bg		Ag/Bg	Ag/Bg		Ag		Ag				Ag/Bg	Ag/Bg		Ag/Bg-v2						Ag/Bgv4							Ag/Bgv1			Ag/Bgv3
Peak assignment3	Ref -3	Begun et al. (1981)					Bg		Ag	Ag/Bg	Bg		Bg/Ag		Bg/Ag		Bg		Bg	Bg		Ag		Ag				Bg	Ag		Agv2		Agv4	Agv4		Bgv4	Ag/Bgv4							Agv1	Agv3	Bgv3	Agv3		Bgv3
Peak assignment4	Ref -4	Clavier et al. (2018)					Lattice		Lattice				Lattice	Lattice	Lattice	Lattice			Lattice	Lattice		Lattice		Lattice				Lattice	Lattice		m2		–	–		–	m4							m1	–	–	Bg		–
Solid	Crystal system	Reference	Laser (nm)	Grating (gr/mm)	Uncertainty (cm-1)	IR 9-fold
LaPO4	monoclinic	Silva et al. (2006)	514		2	1.216	90		100				151	157	170	184			219	226		258		275				396	413		466		534	567		587	620							968	987	1021	1054		1070
LaPO4-theoretical	monoclinic	Errandonea et al. (2018)				1.216	86.3	86.4	98.3	116.1	125.6	137.3	143.3	146.3	163.8	175.5	182.5	208.8	209.3	215.9	240.9	245.9	263.7	265.7			367	387.1		438.8	488	505.2	526.5	537.1	555.6	585.5	587				923.4	929.6		958.6	984.3	989.4	1020.5	1028.2	1036.5
LaPO4-measured	monoclinic	Errandonea et al. (2018)	532		2	1.216				122	128	143	152	158	170	183			219	227	236	257	268	277				396	413	456	466	476	534		570	588	619				923	940		968	987	1021	1054
LaPO4	monoclinic	Begun et al. (1981)				1.216					131		151		170	183			220	227		255		271				394	414		465		537		572	589	619							967	991	1025	1055	1065	1073
LaPO4	monoclinic	Geisler et al. (2016)	532, 633	1800	1	1.216					129.7		149.8	151.9	169	181.9	191.9		217.7	224.9		256		271.4				394.4	412.4		464.5		536.8	558.2	570.3	588.5	618.3							966.9	990.5	1024.7	1055.1	1065.1	1073
CePO4	monoclinic	Silva et al. (2006)	514		2	1.196	88		100				152	158	172	183			219	227		254		270				396	414		467		535	568		588	618							970	990	1025	1054		1071
CePO4-theoretical	monoclinic	Errandonea et al. (2018)				1.196	85.8	88.7	100.8	123.3	128.8	143.1	145.8	149.8	169.1	183.3	193.9	219	221.4	228.4	255.2	261.5	277.4	278.4			374.8	392.1		451.7	493.6	508.7	530.4	540.9	558.2	592.5	594.4				926.1	933.03		963.7	992	995.94	1029.3	1035.9	1044.1
CePO4-measured	monoclinic	Errandonea et al. (2018)	632.8		2	1.196	88	92	102	121	131	143	151	158	175	183			219	227	236	254	268	282				402	414		467		536	561	572	590	620				890			972	994	1034	1046	1064	1075
PrPO4	monoclinic	Silva et al. (2006)	514		2	1.179	90		105				153	160	176	182			225	233		260		282				399	417		470		538	572		592	623							975	995	1029	1058		1075
PrPO4-theoretical	monoclinic	Errandonea et al. (2018)				1.179	87.3	89.8	103.8	124.9	131.5	143.2	149.1	155.2	173.6	183.2	193.7	223.8	224.9	232.5	259.5	264.8	281.8	284.4			376.9	395.4		454.6	497	510	532.7	542.7	560.9	595.8	598.1				930.4	938.3		967.6	995.3	1000.7	1033.4	1040.2	1049.2
PrPO4-measured	monoclinic	Errandonea et al. (2018)	632.8		2	1.179		90	105	122	133		153	158	173	182	196		219	227	233	258	270	282			377	396	414		467	508	534	538	571	591	628				931	939		970	990	1024	1058		1075
NdPO4	monoclinic	Silva et al. (2006)	488		2	1.163	89		106				154	160	175	183			228	236		264		291				398	419		471		539	575		601	625							977	998	1033	1061		1079
SmPO4	monoclinic	Silva et al. (2006)	514		2	1.132	88		107				155	159	177	185			231	243		265		293				404	424		474		542	577		603	629							983	999	1035	1065		1084
EuPO4	monoclinic	Silva et al. (2006)	514		2	1.12	87		108				156	160	175	189			234	243		265		298				404	425		472		543	577		604	631							990	1002	1036	1069		1087
GdPO4	monoclinic	Silva et al. (2006)	514		2	1.107	87		108				158	162	178	192			236	247		268		302				406	428		478		547	580		607	634							988	1003	1039	1072		1091
GdPO4	monoclinic	Clavier et al. (2018)	532	1800	2	1.107																						404	428		476		539	567	577	598	632							987	1004	1042	1071		1092
La90Eu10PO4	monoclinic	Geisler et al. (2016)	532, 633	1800	1	1.2064					129.7		150.1		170.4	181.9	191.9		219.7	226.9		257.3		274.8				395	413.6		464.6		536.6	558.7	570.4	589.1	618.8							969.9	990.9	1026.2	1056.1	1067.4	1074.4
La80Eu20PO4	monoclinic	Geisler et al. (2016)	532, 633	1800	1	1.1968					129.6		151.3		171.6				221.2	226.7		258.7		278				395.5	414.9		464.9		536.7	559.3	570.6	589.8	619.5							972.2	991.4	1026.8	1057.3	1069.7	1076
La70Eu30PO4	monoclinic	Geisler et al. (2016)	532, 633	1800	1	1.1872					129.5		153.3		173.1				221.8	229.9		259.7		280				396.4	416.4		465.5		536.5	559.9	571	590.7	620.4							974.6	991.8	1023.7	1058.5	1069.3	1077.4
La60Eu40PO4	monoclinic	Geisler et al. (2016)	532, 633	1800	1	1.1776					129.6		151.3		176.4				223.3	230.9		260.8		285				397.2	417.8		466.1		536.7	560.7	571.6	591.5	621.5							976.8	992.1	1024	1059.9	1074.1	1079.6
La50Eu50PO4	monoclinic	Geisler et al. (2016)	532, 633	1800	1	1.168					130.4		151.7		177.9				225.5	233.2		262.1		288.7				397.9	419.1		466.8		537	561.2	572.2	592.2	622.5							978.6	992.7	1023.7	1061	1076.1	1081.7
La40Eu60PO4	monoclinic	Geisler et al. (2016)	532, 633	1800	1	1.1584					129.9		151.6		180.4				225.8	232.5		262.1		289.9				398.6	420.2		467.5		536.8	561.3	572.6	592.7	623.6							980.7		1027.1	1062.4	1080.9	1083.2
La30Eu70PO4	monoclinic	Geisler et al. (2016)	532, 633	1800	1	1.1488					130.2		152.9		182.1				228.4	237.3		262.6		292.8				399.4	421.3		468.4		537	561.5	573.1	593.3	624.7							982.5		1028.1	1063.6	1081.5	1085.5
La20Eu80PO4	monoclinic	Geisler et al. (2016)	532, 633	1800	1	1.1392					129.8		153.3		183.8				229.6	239.2		263		295.2				400	422.4		469.4		537	562.4	573.5	593.9	625.8							984.1		1029.5	1064.7		1087.9
La10Eu90PO4	monoclinic	Geisler et al. (2016)	532, 633	1800	1	1.1296					130.5		155.8		172.3	187			232.1	242.1		264.4		299.2				401.4	424.5		471.8		537.4	564.1	574.7	595	628.2							987.1		1031.8	1067.2		1091.4
EuPO4	monoclinic	Geisler et al. (2016)	532, 633	1800	1	1.12					130.8		156.4		173.1	187.9			232.7	243.2		265		300.3				401.9	424.8		471.7		537.4	564.2	575.1	595.3	628.9							988		1034.4	1067.9		1092.1
LaPO4	monoclinic	This study	532	1800	0.5	1.216	88.3495		99.4843	119.101	130.089	141.839	149.353	152.083	168.604		182.066		217.768	224.783		256.254		270.528				394.441	412.159		464.774		536.922	558.368	570.415	588.566	618.16							966.374	990.049	1024.25	1054.63	1064.55	1072.55
LaPO4	monoclinic	This study	532	1800	0.5	1.216	88.3315		99.4668	119.056	130.053	141.902	149.672	152.144	168.558		181.764		217.8	224.712		256.33		270.425				394.383	412.124		464.697		536.831	558.285	570.358	588.396	617.968							966.345	990.01	1024.28	1054.61	1064.5	1072.49
LaPO4	monoclinic	This study	266	2400	1.5	1.216													218.913	224.596		256.723		270.47				394.07	411.613		464.232		536.188		570.089	588.703	617.495							966.2	989.858	1023.68	1054.61	1064.74	1072.61
CePO4	monoclinic	This study	532	1800	0.5	1.196	87.9639		101.765	119.295	130.641	140.28	150.822	155.035	171.615	176.588			219.603	226.905				273.791	304.305			396.94	413.68		467.006				572.112		620.329							970.123	991.669	1025.48	1055.31	1067.26	1072.64
CePO4	monoclinic	This study	532	1800	0.5	1.196	87.8992		101.68	119.555	130.364	139.653	150.606	155.019	171.782	177.104			219.268	227.168		243.892		274.393	309.661			396.942	413.905		466.749		535.577	559.713	571.182	590.023	620.13							970.11	991.689	1025.46	1055.35	1067.29	1072.64
PrPO4	monoclinic	This study	532	1800	0.5	1.179	88.9883		103.899	121.587	131.743	140.935		159.188	176.297			199.892	224.274	232.497		259.034		278.606				397.352	415.606		468.133		536.991	559.286	571.485	591.107	621.45		833.357	879.891	920.528	938.194		973.021	993.261	1027.83	1057.41		1072.4
PrPO4	monoclinic	This study	532	1800	0.5	1.179	88.8795		103.808	121.76	131.557	140.768		159.05	176.392			199.556	224.188	232.277		259.308		278.799		339.236	368.441	397.371	415.752		467.952		536.896	560.098	571.53	591.223	621.435	817.085	833.357	873.089	920.422	938.251		973.118	993.367	1027.98	1057.58	1070.3	1075.13
NdPO4	monoclinic	This study	532	1800	0.5	1.163	88.8023		104.879	121.72	132.027	140.105	153.612	162.37	179.556			200.72	226.195	236.119		263.247		285.343				398.246	418.493		470.056		537.193		572.773	592.225	623.986							975.748	995.251	1030.81	1060.72	1077.99
NdPO4	monoclinic	This study	532	1800	0.5	1.163	88.8353		104.878	121.847	131.926	140.176	153.718	162.471	179.535			200.728	226.229	236.1		262.877		285.097				398.356	418.543		470.268		537.238	561.559	572.786	592.25	624.029							975.808	995.321	1030.86	1060.78	1078.09
NdPO4	monoclinic	This study	266	2400	1.5	1.163													225.609	235.105		262.675		284.595				397.445	417.978		469.986		536.698		572.366	591.451	623.364			876.196		944.099		975.801	995.479	1030.34	1060.88	1077.72
SmPO4	monoclinic	This study	532	1800	0.5	1.132	88.0438		106.773	122.397	131.543	139.136		169.872	185.197				229.589			264.636		297.746					423.229		471.843		537.893		574.878		626.968	817.789				943.653		981.113	998.732		1064.4
SmPO4	monoclinic	This study	532	1800	0.5	1.132	88.0303		106.775	122.47	131.445		155.4	169.913	184.976				229.57	241.585		264.611		298.112					423.265		471.861		538.066		574.98	595.009	627.021	817.748				943.765		981.188	998.744		1064.49
SmPO4	monoclinic	This study	266	2400	1.5	1.132													229.251			264.683		297.483					423.049		471.662		537.98		574.725		626.795			882.79		945.936	956.672	981.336	998.963		1064.7
EuPO4	monoclinic	This study	532	1800	0.5	1.12	85.9989		107.541	122.795	130.903	155.342	156.496	168.037	180.048			207.321	233.113	243.932		265.146		288.546	299.712		388.371	402.182	424.265		470.572	496.685	538.368	564.551	575.407	595.443	629.382							987.65	1011.48	1041.44	1067.6	1081.41	1091.87
EuPO4	monoclinic	This study	266	2400	1.5	1.12													231.441	242.105		264.06		289.88	299.257	322.041		401.767	421.252		469.972	518.633	537.549	564.572	574.945	594.964	628.495					945.213		986.64	1025.67		1066.41	1081.17	1089.71
GdPO4	monoclinic	This study	532	1800	0.5	1.107	85.6358		107.228	122.226	129.806	137.1	157.56	176.632	181.513				235.519	246.837		267.903		294.689	307.634			403.884	426.999		476.101		539.296	566.369	576.954	597.709	631.717	816.264				950.093		986.083		1041.99	1071.33		1090.33
GdPO4	monoclinic	This study	532	1800	0.5	1.107	85.6146		107.168	122.406	129.754	135.882	157.641	177.17	182.112		190.309		235.615	246.674		267.463		293.926	306.571			403.971	426.857		476.191		539.219	566.425	577.102	597.8	631.722	814.495				950.433		986.114		1042.19	1071.08		1091.23
GdPO4	monoclinic	This study	266	2400	1.5	1.107													234.877	246.16		267.03		293.424	305.319	320.79		403.386	426.419		475.978	521.711	539.052	566.161	576.6	597.283	631.247		830.506	884.668	929.362			985.956		1041.96	1070.84		1090.41
Ce0.47Nd0.53	monoclinic	This study	532	1800	0.5	1.17851	88.9603			121.052	131.517	140.97	152.8	159.265	176.905				222.881	232.454				280.189	293.921		398.128	416.366	469.249			536.483			571.911	590.943		622.034				942.527		973.4	993.679	1028.51	1058.3	1070.34	1075.98
Ce0.46La0.54	monoclinic	This study	532	1800	0.5	1.2068	89.0391		100.866	119.71	130.569		153.813	170.494	179.45				218.832	226.127		256.9		272.741		317.047	395.877	413.152	465.997			536.465			570.6	588.972		618.822				941.607		968.296	990.852	1025.04	1054.95	1066.27	1072.79
[truncated: 3 more columns]

## Sheet: Rhapdophane
Peak assignment1	Ref -1	Clavier et al. (2018)											lattice	lattice	lattice	v2	v2		v4		v4	v4								v1		v3	v3		d(H2O)	v(H2O)-1	v(H2O)-1	v(H2O)-1
Peak assignment1	Ref -2	Colomer et al. (2017)											lattice
Solid	Crystal system	Reference	Laser (nm)	Grating (gr/mm)	Uncertainty (cm-1)	IR 8-fold	IR 9-fold
CePO4	monoclinic	Liu et al. (2022)				1.143	1.196						229	298	375		470				573	625								978			1086
NdPO4	monoclinic	Liu et al. (2022)				1.109	1.163						236				470				579	625								983			1094
NdLaPO4-rhabdophane	monoclinic	Zhukova et al. 2021	532														470													983			1113		2854	2968	3068
GdPO4-rhabdophane	monoclinic	Clavier et al. (2018)	532	1800		1.053	1.107									429	471		538		576	620							985	994			1106			3330	3475	3540
LaPO4*0.667H2O	monoclinic	This study	532	600	2	1.16	1.216	61.8293	86.4806	116.407			228.525		373.425	410.268	466.843	497.602	543.882		571.83	623.003	889.196					954.081	970.106	973.419		1030.43	1082.04	2888.42		3278.56	3455.62	3573.53
CePO4*0.667H2O	monoclinic	This study	532	600	2	1.143	1.196	62.1484	87.1898	113.895			228.061		373.921	413	467.222	498.487	541.468		572.873	623.613			892.498			950.089	971.059	976.376		1032.56	1084.36	2915.5		3279.51	3457.13	3572.65
PrPO4*0.667H2O	monoclinic	This study	532	600	2	1.126	1.179	63.0134	87.0446	114.016			232.943		373.886	414.955	467.135	497.356	543.504		574.053	625.125			893.591			952.3	974.5	979.206			1088.23	2908.76		3278.6	3460.84	3574.16
NdPO4*0.667H2O	monoclinic	This study	532	600	2	1.109	1.163	62.331	88.085	113.769		168.287	232.611		373.493	416.704	468.824	500.486	543.001		577.979	627.632			806.846	898.15		954.85	977.4	980.91		1041.35	1092.24	2908.02		3278.6	3465.84	3574.16	3708.51	3748.97	3892.55
NdPO4*0.667H2O	monoclinic	This study	532	600	2	1.109	1.163	62.4577	87.8566	112.885		166.955	233.089		373.856	415.907	468.699	498.374	542.149		577.32	627.246			817.024	893.886		953.07	976.64	980.57		1081.94	1091.39	2915.73		3278.6	3465.84	3574.16	3703.13	3752.51	3887.3
SmPO4*0.667H2O	monoclinic	This study	532	600	2	1.079	1.132	62.7108	89.338	111.101		171.214	236.842		375.199	420.203	468.062	497.576	544.364		580.271	628.861		702.482	819.483			950.801	976.418	985.239		1043.74		1095.73		3278.6	3465.84	3574.16	3681.55
EuPO4*0.667H2O	monoclinic	This study	532	600	2	1.066	1.12	63.1068	90.3063	111.376	138.189		239.388		375.439	423.758	467.295	504.278	544.475	568.525	582.027	636.322	683.096	703.502	764.748	867.134		975.3	987.75	991.632		1039.76		1106.21		3320.84	3484.65	3587.06	3673.28
GdPO4*0.667H2O	monoclinic	This study	532	600	2	1.053	1.107	62.9409	90.6756	108.78		178.188	235.717		373.46	457.719	470.394		544.507		583.581	631.865		710.111	819.315		903.262	971.02	986.8	991.918		1056.04		1102.42	2867.48	3278.6	3460.84	3570.06		3764.19
LaPO4*0.667H2O	monoclinic	This study	532	1800	0.5	1.16	1.216																				897.088	964.293	971.355	973.882	998.325	1030.18	1082.28
LaPO4*0.667H2O	monoclinic	This study	266	2400	1.5	1.16	1.216																				893.592	953.914	970.39	974.099		1031.44	1082.69
CePO4*0.667H2O	monoclinic	This study	532	1800	0.5	1.143	1.196																				897.795	962.02	974.478	977.292	982.347		1084.6
CePO4*0.667H2O	monoclinic	This study	532	1800	0.5	1.143	1.196																				893.259	956.004	973.608	977.393			1085.34
CePO4*0.667H2O	monoclinic	This study	532	1800	0.5	1.143	1.196																				897.226	961.336	974.439	977.278	990.819	1033.34	1084.9
PrPO4*0.667H2O	monoclinic	This study	532	1800	0.5	1.126	1.179																				898.18	966.047	977.028	979.911	985.262		1088.57
PrPO4*0.667H2O	monoclinic	This study	532	1800	0.5	1.126	1.19175																				898.311	962.63	976.834	979.85		1038.88	1088.63
PrPO4*0.667H2O	monoclinic	This study	266	2400	1.5	1.126	1.179																				896.098	955.119	975.72	979.651		1035.22	1088.89
NdPO4*0.667H2O	monoclinic	This study	532	1800	0.5	1.109	1.163																				892.482	974.612	982.142	982.183	987.909		1092.93
NdPO4*0.667H2O	monoclinic	This study	266	2400	1.5	1.109	1.163																					954.491		984.371	992.057		1090.43
SmPO4*0.667H2O	monoclinic	This study	532	1800	0.5	1.079	1.132																				895.302	975.494		984.29	987.845	1048.03	1096.71
SmPO4*0.667H2O	monoclinic	This study	532	1800	0.5	1.079	1.132																				906.931	976.67		985.014	988.407		1097.43
SmPO4*0.667H2O	monoclinic	This study	266	2400	1.5	1.079	1.132																				793.682	957.597		959.88		1034.61
EuPO4*0.667H2O	monoclinic	This study	532	1800	0.5	1.066	1.12																				870.781	983.475	985.432	992.019			1102.47
EuPO4*0.667H2O	monoclinic	This study	532	1800	0.5	1.066	1.12																				872.472	975.527	989.859	992.47			1102.95
EuPO4*0.667H2O	monoclinic	This study	532	1800	0.5	1.066	1.12																				871.355	979.204	990.335	992.978		1074.01	1104.74
EuPO4*0.667H2O	monoclinic	This study	266	2400	1.5	1.066	1.12																					947.367		964.784		1047.15
GdPO4*0.667H2O	monoclinic	This study	532	1800	0.5	1.053	1.107																				905.95	984.5	990.421	992.968			1105.63
GdPO4*0.667H2O	monoclinic	This study	532	1800	0.5	1.053	1.107																				906.151	984.613	990.522	993.031			1105.55
GdPO4*0.667H2O	monoclinic	This study	532	1800	0.5	1.053	1.107																				904.391	984.527	990.906	992.982		1043.91	1105.27
Eu10Ce90	monoclinic	This study	532	1800	0.5	1.1353	1.1884																				898.488	957.357	975.183	978.484			1087.36
Eu10Ce90	monoclinic	This study	532	1800	0.5	1.1353	1.1884																				898.243	954.487	974.795	978.451			1087.76
Eu50Ce50	monoclinic	This study	532	1800	0.5	1.1045	1.158																				893.319	956.648	979.342	983.561			1093.52
Eu75Ce50	monoclinic	This study	532	1800	0.5	1.08525	1.139																				877.869	963.561	983.831	987.831			1099.34
Eu90Ce10	monoclinic	This study	532	1800	0.5	1.0737	1.1276																				873.097	966.752	986.578	990.229			1103.82
Nd10Ce90	monoclinic	This study	532	1800	0.5	1.1396	1.1927																				897.047	960.633	974.815	978.192			1086.62
Nd25Ce75	monoclinic	This study	532	1800	0.5	1.1345	1.18775																				894.921	972.387	975.512	978.738		1065.02	1087.87
Nd50Ce50	monoclinic	This study	532	1800	0.5	1.126	1.1795																				896.218	971.853	977.754	979.72			1089.66
Nd75Ce25	monoclinic	This study	532	1800	0.5	1.1175	1.17125																				894.849	974.901	979.334	981.102			1090.66
Nd90Ce10	monoclinic	This study	532	1800	0.5	1.1124	1.1663																				895.561		976.845	982.483			1091.93
Pr25Ce75	monoclinic	This study	532	1800	0.5	1.13875	1.19175																				900.987	968.034	975.634	978.309		1033.6	1086.72
Pr50Ce50	monoclinic	This study	532	1800	0.5	1.1345	1.1875																				901.179	969.645	976.058	978.704		1038.65	1087.3
Pr75Ce25	monoclinic	This study	532	1800	0.5	1.13025	1.18325																				898.354	958.215	975.629	979.421		1034.49	1087.52
Pr90Ce10	monoclinic	This study	532	1800	0.5	1.1277	1.1807																				896.721	958.922	975.847	979.441		1034.78	1087.57
Gd10Ce90	monoclinic	This study	532	1800	0.5	1.134	1.1871																				893.154	973.489	980.553	988.503		1061.71	1086.97
Gd25Ce75	monoclinic	This study	532	1800	0.5	1.1205	1.17375																				898.346	972.904	978.204	980.616			1090.07
Gd50Ce50	monoclinic	This study	532	1800	0.5	1.098	1.1515																				903.96	974.971	982.243	984.019		1039.46	1093.71
Gd90Ce10	monoclinic	This study	532	1800	0.5	1.0755	1.12925																				900.339	975.398	988.278	991.181		1050.25	1101.59
